# Supplementary material
Source: PubMed Central journal article supplement (PMC7866491)
Supplement: NIHMS1664679-supplement-Supplementary_tables.pdf [file NIHMS1664679-supplement-Supplementary_tables.pdf]

Supplementary table 1: Baseline characteristics of the participants

| Characteristics                                    | Non-cases<br>(n=34,050) | Hyperthyroidism (n=271) |                          |
|----------------------------------------------------|-------------------------|-------------------------|--------------------------|
|                                                    | n (%)                   | n (%)                   | OR (95% CI) <sup>a</sup> |
| <b>Age</b>                                         |                         |                         |                          |
| ≤ 45 years                                         | 17009 (50)              | 109 (40.2)              | Ref                      |
| 46-55 years                                        | 8086 (23.7)             | 66 (24.4)               | 1.09 (0.79, 1.50)        |
| 56-65 years                                        | 6226 (18.3)             | 70 (25.8)               | 1.46 (1.05, 2.02)        |
| > 65 years                                         | 2729 (8)                | 26 (9.6)                | 1.15 (0.72, 1.85)        |
| <b>Gender</b>                                      |                         |                         |                          |
| Women                                              | 706 (2.1)               | 21 (7.7)                | Ref                      |
| Men                                                | 33344 (97.9)            | 250 (92.3)              | 0.32 (0.19, 0.53)        |
| <b>State of residence</b>                          |                         |                         |                          |
| Iowa                                               | 22223 (65.3)            | 147 (54.2)              | Ref                      |
| North Carolina                                     | 11827 (34.7)            | 124 (45.8)              | 1.18 (0.89, 1.56)        |
| <b>Education</b>                                   |                         |                         |                          |
| ≤ High school graduate                             | 19165 (56.3)            | 158 (58.3)              | Ref                      |
| 1–3 years beyond high school                       | 8585 (25.2)             | 69 (25.5)               | 1.13 (0.84, 1.52)        |
| College graduate or more                           | 6300 (18.5)             | 44 (16.2)               | 0.94 (0.66, 1.34)        |
| <b>Smoking status</b>                              |                         |                         |                          |
| Never smoker                                       | 18810 (55.2)            | 134 (49.4)              | Ref                      |
| Former smoker                                      | 10315 (30.3)            | 93 (34.3)               | 1.20 (0.90, 1.60)        |
| Current smoker                                     | 4925 (14.5)             | 44 (16.2)               | 1.25 (0.87, 1.81)        |
| <b>Alcohol consumption (past year)<sup>b</sup></b> |                         |                         |                          |
| No                                                 | 10933 (33.3)            | 120 (46.9)              | Ref                      |
| Yes                                                | 21907 (66.7)            | 136 (53.1)              | 0.64 (0.49, 0.85)        |

Abbreviations: OR, Odds Ratio; CI, Confidence Intervals

<sup>a</sup>Estimated using logistic regression with all covariates in the model

<sup>b</sup>n=1210 missing for non-cases, and 15 missing in hyperthyroidism

Supplementary table 2: Ever-use of pesticides and hyperthyroidism risk excluding female applicators (n= 34,375)<sup>a</sup>

| Pesticides                                        | Exposed cases | HR (95% CI) <sup>b</sup> |
|---------------------------------------------------|---------------|--------------------------|
| Organochlorine insecticide                        |               |                          |
| Aldrin                                            | 43            | 0.83 (0.58, 1.19)        |
| Chlordane                                         | 67            | 0.95 (0.70, 1.28)        |
| DDT                                               | 72            | 1.00 (0.73, 1.37)        |
| Dieldrin                                          | 18            | 1.02 (0.62, 1.68)        |
| Heptachlor                                        | 37            | 0.91 (0.62, 1.34)        |
| Lindane                                           | 45            | 0.99 (0.71, 1.37)        |
| Toxaphene                                         | 31            | 0.74 (0.50, 1.09)        |
| Carbamate insecticide                             |               |                          |
| Aldicarb                                          | 26            | 0.85 (0.55, 1.32)        |
| Carbaryl                                          | 133           | 0.79 (0.59, 1.05)        |
| Carbofuran ≤ 62 years <sup>c</sup>                | 28            | <b>0.65 (0.42, 0.98)</b> |
| > 62 years                                        | 28            | 1.00 (0.64, 1.58)        |
| Organophosphate insecticide                       |               |                          |
| Chlorpyrifos                                      | 93            | 0.84 (0.65, 1.09)        |
| Coumaphos                                         | 15            | 0.73 (0.43, 1.23)        |
| Diazinon                                          | 84            | 1.10 (0.83, 1.47)        |
| Dichlorvos                                        | 23            | 1.00 (0.64, 1.56)        |
| Fonofos                                           | 51            | 1.16 (0.83, 1.62)        |
| Malathion                                         | 149           | <b>0.66 (0.50, 0.87)</b> |
| Parathion                                         | 39            | 0.95 (0.66, 1.36)        |
| Phorate                                           | 61            | 0.75 (0.55, 1.02)        |
| Terbufos                                          | 82            | 0.91 (0.69, 1.21)        |
| Pyrethroid insecticide                            |               |                          |
| Permethrin (animals)                              | 29            | 1.06 (0.71, 1.59)        |
| Permethrin (crops)                                | 24            | 0.78 (0.51, 1.20)        |
| Fumigant                                          |               |                          |
| Carbon tetrachloride/ Carbon disulphide 80/20 mix | 13            | 0.92 (0.52, 1.62)        |
| Aluminum Phosphide                                | 11            | 0.98 (0.54, 1.81)        |
| Ethylene Dibromide                                | 11            | 1.15 (0.62, 2.14)        |
| Methyl Bromide                                    | 47            | 0.87 (0.60, 1.25)        |
| Fungicide                                         |               |                          |
| Benomyl                                           | 20            | 0.66 (0.41, 1.08)        |
| Chlorothalonil                                    | 15            | 0.60 (0.35, 1.04)        |
| Maneb                                             | 17            | <b>0.54 (0.32, 0.91)</b> |
| Metalaxyl                                         | 60            | 0.90 (0.64, 1.26)        |
| Herbicide                                         |               |                          |
| Alachlor                                          | 113           | 0.82 (0.63, 1.07)        |
| Butylate                                          | 61            | 0.76 (0.56, 1.03)        |
| Chlorimuron Ethyl ≤ 62 years <sup>c</sup>         | 42            | <b>0.66 (0.46, 0.95)</b> |
| > 62 years                                        | 29            | 1.23 (0.78, 1.94)        |
| Dicamba                                           | 98            | 0.76 (0.56, 1.03)        |

| Pesticides    | Exposed cases | HR (95% CI) <sup>b</sup> |
|---------------|---------------|--------------------------|
| EPTC          | 35            | 0.83 (0.57, 1.20)        |
| Glyphosate    | 197           | 1.10 (0.80, 1.51)        |
| Imazethapyr   | 89            | 1.04 (0.76, 1.43)        |
| Metolachlor   | 82            | <b>0.70 (0.53, 0.92)</b> |
| Paraquat      | 48            | <b>0.71 (0.50, 1.00)</b> |
| Pendimethalin | 95            | 0.90 (0.69, 1.18)        |
| Petroleum Oil | 100           | 0.91 (0.69, 1.19)        |
| Trifluralin   | 118           | 1.04 (0.79, 1.38)        |
| 2,4-D         | 182           | 0.87 (0.65, 1.17)        |
| 2,4,5-T       | 56            | 1.03 (0.75, 1.41)        |
| 2,4,5-T P     | 22            | 0.94 (0.60, 1.47)        |
| Atrazine      | 166           | 0.77 (0.59, 1.02)        |
| Cyanazine     | 84            | 0.87 (0.64, 1.17)        |
| Metribuzin    | 99            | 0.97 (0.73, 1.29)        |

Abbreviation: 2,4-D, 2,4-Dichlorophenoxyacetic acid; 2,4,5-T, 2,4,5-Trichlorophenoxyacetic acid; 2,4,5-T,P, 2-(2,4,5-trichlorophenoxy) propionic acid; CI, Confidence Intervals; DDT,

Dichlorodiphenyltrichloroethane; EPTC, S-Ethyl dipropylthiocarbamate; HR, Hazard Ratio

<sup>a</sup>Of 34375, 33,344 were non-cases, 250 were hyperthyroidism cases, and 781 were hypothyroidism cases.

<sup>b</sup>Adjusted for education, state, and smoking

<sup>c</sup>Hazard ratio allowed to vary by the median age (i.e., 62 years) for pesticides for which proportional hazards assumptions were not met ( $p \leq 0.10$ )

Note: bold-face indicates  $p$ -value  $\leq 0.05$ .

Supplementary table 3: Ever-use of pesticides and hyperthyroidism risk adjusting for pesticides with Spearman correlation coefficient  $\geq 0.40$ .

| Pesticide                                | HR (95% CI) <sup>a</sup> | Correlated pesticides           |
|------------------------------------------|--------------------------|---------------------------------|
| Organochlorine insecticide               |                          |                                 |
| Aldrin                                   | 0.78 (0.50, 1.20)        | DDT, Dieldrin, Heptachlor       |
| Chlordane                                | 0.92 (0.67, 1.27)        | DDT                             |
| DDT                                      | 0.98 (0.69, 1.39)        | Aldrin, Chlordane               |
| Dieldrin                                 | 1.18 (0.67, 2.07)        | Aldrin, Heptachlor              |
| Heptachlor                               | 1.02 (0.65, 1.59)        | Aldrin, Dieldrin                |
| Carbamate insecticide                    |                          |                                 |
| Aldicarb                                 | 0.94 (0.58, 1.52)        | Benomyl, Chlorothalonil         |
| Carbaryl                                 | 0.81 (0.60, 1.10)        | Diazinon                        |
| Organophosphate insecticide              |                          |                                 |
| Diazinon                                 | 1.13 (0.84, 1.52)        | Carbaryl                        |
| Fumigant                                 |                          |                                 |
| Methyl Bromide                           | 0.90 (0.60, 1.36)        | Metalaxyl                       |
| Fungicide                                |                          |                                 |
| Benomyl                                  | 0.96 (0.54, 1.69)        | Maneb, Chlorothalonil, Aldicarb |
| Chlorothalonil                           | 0.65 (0.33, 1.25)        | Aldicarb, Benomyl               |
| Maneb                                    | <b>0.49 (0.27, 0.87)</b> | Benomyl                         |
| Metalaxyl                                | 0.97 (0.69, 1.38)        | Methyl Bromide                  |
| Herbicide                                |                          |                                 |
| Butylate                                 | 0.75 (0.54, 1.03)        | Metribuzin                      |
| Dicamba                                  | <b>0.72 (0.53, 0.98)</b> | Imazethapyr                     |
| Imazethapyr $\leq 62$ years <sup>b</sup> | 0.83 (0.56, 1.23)        | Dicamba                         |
| $> 62$ years                             | <b>1.90 (1.10, 3.10)</b> |                                 |
| Trifluralin                              | 1.03 (0.76, 1.40)        | Metribuzin                      |
| 2,4,5-T                                  | 1.04 (0.72, 1.50)        | 2,4,5-TP                        |
| 2,4,5-TP                                 | 0.89 (0.53, 1.49)        | 2,4,5-T                         |
| Metribuzin                               | 1.03 (0.75, 1.43)        | Butylate, Trifluralin           |

Abbreviation: 2,4,5-T, 2,4,5-Trichlorophenoxyacetic acid; 2,4,5-T,P, 2-(2,4,5-trichlorophenoxy) propionic acid; CI, Confidence Intervals; DDT, Dichlorodiphenyltrichloroethane; HR, Hazard Ratio

<sup>a</sup> Adjusted for sex, education, state, smoking, and correlated pesticides

<sup>b</sup> Hazard ratio allowed to vary by the median age (i.e., 62 years) for pesticides for which proportional hazards assumptions were not met ( $p \leq 0.10$ )

Note: bold-face indicates  $p$ -value  $\leq 0.05$ .

Supplementary table 4: Intensity-weighted lifetime days of use of pesticides and hyperthyroidism risk

| Pesticide                   | Days      | Hyperthyroidism cases | HR (95% CI) <sup>a</sup> | P-trend <sup>b</sup> |
|-----------------------------|-----------|-----------------------|--------------------------|----------------------|
| Organochlorine insecticide  |           |                       |                          |                      |
| Chlordane                   | Unexposed | 99                    | Ref                      | 0.81                 |
|                             | >0–≤350   | 13                    | 0.91 (0.50, 1.64)        |                      |
|                             | >350      | 16                    | 1.07 (0.62, 1.84)        |                      |
| DDT                         | Unexposed | 93                    | Ref                      | 0.23                 |
|                             | >0–≤770   | 20                    | 1.23 (0.74, 2.04)        |                      |
|                             | >770      | 13                    | 0.71 (0.39, 1.31)        |                      |
| Carbamate insecticide       |           |                       |                          |                      |
| Carbofuran                  | Unexposed | 177                   | Ref                      | <b>0.01</b>          |
|                             | >0–≤775   | 36                    | 1.06 (0.74, 1.52)        |                      |
|                             | >775      | 20                    | <b>0.55 (0.34, 0.87)</b> |                      |
| Chlorpyrifos                | Unexposed | 145                   | Ref                      | <b>&lt;0.01</b>      |
|                             | >0–≤894   | 64                    | 1.15 (0.86, 1.55)        |                      |
|                             | >894      | 33                    | <b>0.59 (0.40, 0.86)</b> |                      |
| Organophosphate insecticide |           |                       |                          |                      |
| Fonofos                     | Unexposed | 182                   | Ref                      | 0.71                 |
|                             | >0–≤882   | 29                    | 1.25 (0.83, 1.88)        |                      |
|                             | >882      | 20                    | 0.92 (0.57, 1.48)        |                      |
| Malathion                   | Unexposed | 50                    | Ref                      | 0.34                 |
|                             | >0–≤735   | 39                    | 0.92 (0.60, 1.41)        |                      |
|                             | >735      | 41                    | 0.81 (0.53, 1.23)        |                      |
| Phorate                     | Unexposed | 97                    | Ref                      | 0.22                 |
|                             | >0–≤662   | 19                    | 1.04 (0.62, 1.76)        |                      |
|                             | >662      | 13                    | 0.69 (0.38, 1.25)        |                      |
| Terbufos                    | Unexposed | 156                   | Ref                      | 0.48                 |
|                             | >0–≤1206  | 41                    | 0.92 (0.65, 1.32)        |                      |
|                             | >1206     | 40                    | 0.87 (0.61, 1.25)        |                      |
| Pyrethroid insecticide      |           |                       |                          |                      |
| Permethrin (animals)        | Unexposed | 204                   | Ref                      | 0.60                 |
|                             | >0–≤740   | 11                    | 0.78 (0.42, 1.43)        |                      |
|                             | >740      | 16                    | 1.16 (0.69, 1.94)        |                      |
| Permethrin (crops)          | Unexposed | 208                   | Ref                      | 0.25                 |
|                             | >0–≤490   | 10                    | 0.66 (0.35, 1.25)        |                      |
|                             | >490      | 12                    | 0.72 (0.40, 1.29)        |                      |
| Fumigant                    |           |                       |                          |                      |
| Methyl Bromide              | Unexposed | 216                   | Ref                      | 0.57                 |
|                             | >0–≤682   | 18                    | 0.71 (0.43, 1.18)        |                      |
|                             | >682      | 29                    | 1.08 (0.70, 1.67)        |                      |
| Fungicide                   |           |                       |                          |                      |
| Metalaxyl                   | Unexposed | 100                   | Ref                      | 0.51                 |
|                             | >0–≤756   | 14                    | 0.97 (0.55, 1.73)        |                      |
|                             | >756      | 14                    | 0.82 (0.44, 1.5)         |                      |
| Herbicide                   |           |                       |                          |                      |
| Alachlor                    | Unexposed | 118                   | Ref                      | 0.36                 |
|                             | >0–≤1550  | 57                    | 0.88 (0.64, 1.22)        |                      |

| Pesticide         | Days      | Hyperthyroidism cases | HR (95% CI) <sup>a</sup> | P-trend <sup>b</sup> |
|-------------------|-----------|-----------------------|--------------------------|----------------------|
| Butylate          | >1550     | 56                    | 0.84 (0.61, 1.16)        | 0.18                 |
|                   | Unexposed | 107                   | Ref                      |                      |
|                   | >0-≤882   | 10                    | 0.54 (0.28, 1.04)        |                      |
| Chlorimuron Ethyl | >882      | 12                    | 0.66 (0.36, 1.21)        | 0.93                 |
|                   | Unexposed | 91                    | Ref                      |                      |
|                   | >0-≤354   | 20                    | 1.15 (0.70, 1.88)        |                      |
| Dicamba           | >354      | 19                    | 1.02 (0.62, 1.68)        | 0.29                 |
|                   | Unexposed | 138                   | Ref                      |                      |
|                   | >0-≤1078  | 48                    | 0.72 (0.50, 1.04)        |                      |
| Glyphosate        | >1078     | 49                    | 0.76 (0.53, 1.08)        | 0.47                 |
|                   | Unexposed | 58                    | Ref                      |                      |
|                   | >0-≤1232  | 98                    | 1.03 (0.74, 1.43)        |                      |
| Imazethapyr       | >1232     | 110                   | 1.12 (0.80, 1.55)        | 0.82                 |
|                   | Unexposed | 142                   | Ref                      |                      |
|                   | >0-≤637   | 49                    | 1.12 (0.77, 1.62)        |                      |
| Metolachlor       | >637      | 41                    | 0.98 (0.67, 1.44)        | 0.09                 |
|                   | Unexposed | 146                   | Ref                      |                      |
|                   | >0-≤1344  | 45                    | 0.8 (0.56, 1.12)         |                      |
| Pendimethalin     | >1344     | 40                    | 0.71 (0.50, 1.02)        | 0.09                 |
|                   | Unexposed | 91                    | Ref                      |                      |
|                   | >0-≤725   | 21                    | 0.90 (0.56, 1.45)        |                      |
| Petroleum         | >725      | 16                    | 0.62 (0.36, 1.07)        | 0.49                 |
|                   | Unexposed | 103                   | Ref                      |                      |
|                   | >0-≤1029  | 15                    | 1.23 (0.71, 2.13)        |                      |
| Trifluralin       | >1029     | 10                    | 0.80 (0.42, 1.53)        | 0.96                 |
|                   | Unexposed | 115                   | Ref                      |                      |
|                   | >0-≤2016  | 61                    | 1.07 (0.77, 1.48)        |                      |
| 2,4-D             | >2016     | 58                    | 1.03 (0.73, 1.43)        | 0.27                 |
|                   | Unexposed | 78                    | Ref                      |                      |
|                   | >0-≤2552  | 97                    | 0.91 (0.66, 1.25)        |                      |
| Atrazine          | >2552     | 89                    | 0.82 (0.59, 1.13)        | 0.22                 |
|                   | Unexposed | 100                   | Ref                      |                      |
|                   | >0-≤2240  | 82                    | 0.77 (0.56, 1.05)        |                      |
| Cyanazine         | >2240     | 83                    | 0.75 (0.55, 1.02)        | 0.29                 |
|                   | Unexposed | 151                   | Ref                      |                      |
|                   | >0-≤1062  | 44                    | 0.89 (0.62, 1.27)        |                      |
| Metribuzin        | >1062     | 39                    | 0.80 (0.55, 1.17)        | 0.22                 |
|                   | Unexposed | 91                    | Ref                      |                      |
|                   | >0-≤588   | 22                    | 0.92 (0.56, 1.51)        |                      |
|                   | >588      | 17                    | 0.71 (0.42, 1.22)        |                      |

Abbreviation: 2,4-D, 2,4-Dichlorophenoxyacetic acid; CI, Confidence Intervals; DDT, Dichlorodiphenyltrichloroethane; HR, Hazard Ratio

<sup>a</sup> Adjusted for sex, education, state, and smoking

<sup>b</sup> P-trend values were obtained using an ordinal variable coded with median values for each category

Note: bold-face indicates p-value ≤ 0.05, and intensity-weighted analyses are presented only for the pesticides with adequate sample size
